# Supplementary material for: Fake legal logging in the Brazilian Amazon
Source: PubMed Central journal article supplement — Sci Adv. 2018 Aug 15;4(8):eaat1192. doi: 10.1126/sciadv.aat1192 (PMC6093652; doi:10.1126/sciadv.aat1192), 2018-08-15
Supplement: aat1192_SM.pdf [file aat1192_SM.pdf]

## Supplementary Materials for

### **Fake legal logging in the Brazilian Amazon**

Pedro H. S. Brancalion\*, Danilo R. A. de Almeida, Edson Vidal, Paulo G. Molin,  
Vanessa E. Sontag, Saulo E. X. F. Souza, Mark D. Schulze

\*Corresponding author. Email: pedrob@usp.br

Published 15 August 2018, *Sci. Adv.* **4**, eaat1192 (2018)  
DOI: 10.1126/sciadv.aat1192

#### **This PDF file includes:**

Fig. S1. Study sites in Pará state, eastern Amazon, Brazil.

Table S1. Commercial timber species used in the study and their associated characteristics.

Supplementary figure and table

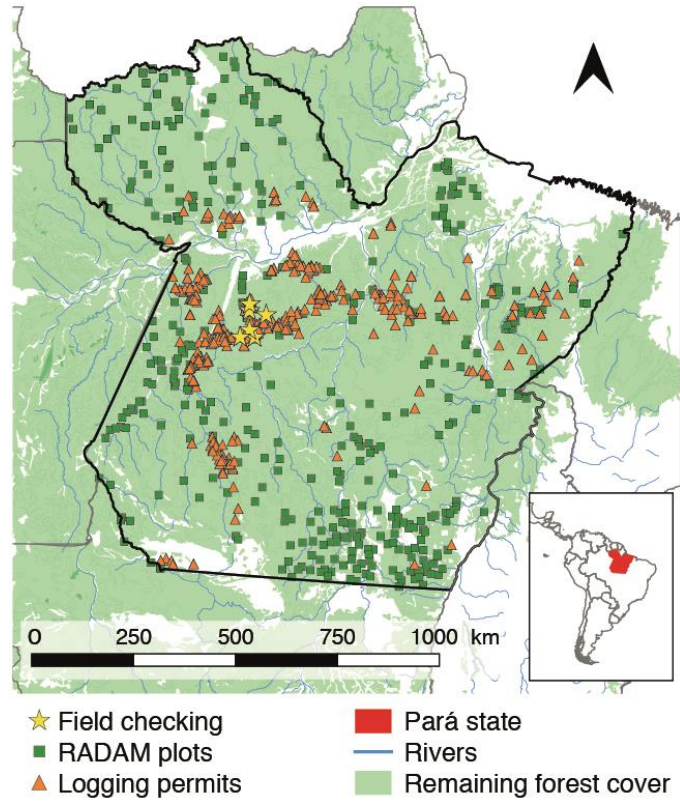

**Fig. S1. Study sites in Pará state, eastern Amazon, Brazil.**

**Table S1. Commercial timber species used in the study and their associated characteristics.**

| Commercial timber species - common names in logging permits | Commercial timber species - scientific names in logging permits | Scientific names associated with commercial timber species listed in logging permits                                          | "standing trees" timber price (US\$ m <sup>-3</sup> ) | Logging permits with this timber species | Timber volume in logging permits (m <sup>3</sup> ) | Trees in logging permits | Value of licensed timber (US\$) |
|-------------------------------------------------------------|-----------------------------------------------------------------|-------------------------------------------------------------------------------------------------------------------------------|-------------------------------------------------------|------------------------------------------|----------------------------------------------------|--------------------------|---------------------------------|
| Ipê                                                         | <i>Tabebuia</i> spp.                                            | <i>Handroanthus impetiginosus</i> (Mart. ex DC.) Standl.; <i>H. serratifolius</i> (Vahl) G.Nicholson; <i>Handroanthus</i> sp. | 30.16                                                 | 366                                      | 344,737                                            | 45,100                   | 10,396,818                      |
| Cumaru                                                      | <i>Dipteryx</i> spp.                                            | <i>Dipteryx odorata</i> (Aubl.) Willd.; <i>D. speciosa</i> (Ducke) Ducke; <i>D. trifoliolata</i> (Ducke) Ducke                | 26.35                                                 | 255                                      | 132,051                                            | 26,083                   | 3,480,282                       |
| Jatobá                                                      | <i>Hymenaea courbaril</i>                                       | <i>Hymenaea courbaril</i> L.                                                                                                  | 20.17                                                 | 401                                      | 397,935                                            | 60,029                   | 8,026,919                       |
| Maçaranduba                                                 | <i>Manilkara huberi</i>                                         | <i>Manilkara huberi</i> (Ducke) Standl.                                                                                       | 19.64                                                 | 348                                      | 1,202,560                                          | 208,309                  | 23,627,445                      |
| Itaúba                                                      | <i>Mezilaurus itauba</i>                                        | <i>Mezilaurus itauba</i> (Meisn.) Taub. ex Mez                                                                                | 18.14                                                 | 192                                      | 107,037                                            | 25,724                   | 1,941,956                       |
| Sucupira                                                    | <i>Bowdichia</i> spp.                                           | <i>Bowdichia virgilioides</i> Kunth; <i>B. nítida</i> Benth.; <i>Diploptropis purpurea</i> (Rich.) Amshoff                    | 17.95                                                 | 156                                      | 39,179                                             | 8,017                    | 703,227                         |
| Faveira                                                     | <i>Piptadenia suaveolens</i>                                    | <i>Piptadenia suaveolens</i> Griseb.                                                                                          | 7.83                                                  | 113                                      | 92,284                                             | 18,948                   | 723,037                         |
| Cupiúba                                                     | <i>Goupia glabra</i>                                            | <i>Goupia glabra</i> Aubl.                                                                                                    | 6.31                                                  | 263                                      | 338,022                                            | 61,769                   | 2,134,370                       |
| Piquiá                                                      | <i>Caryocar</i> spp.                                            | <i>Caryocar microcarpum</i> Ducke; <i>C. villosum</i> (Aubl.)                                                                 | 5.73                                                  | 244                                      | 152,391                                            | 20,432                   | 873,708                         |

|           |                            |                                                                     |      |    |        |       |         |
|-----------|----------------------------|---------------------------------------------------------------------|------|----|--------|-------|---------|
|           |                            | Pers.; <i>C. glabrum</i> (Aubl.)                                    |      |    |        |       |         |
|           |                            | Pers.                                                               |      |    |        |       |         |
| Tanimbuca | <i>Terminalia amazonia</i> | <i>Terminalia amazonia</i> (J.F.Gmel.) Exell                        | 5.72 | 51 | 21,060 | 3,736 | 120,543 |
| Amesclão  | <i>Trattinnickia</i> spp.  | <i>Trattinnickia rhoifolia</i> Willd.; <i>T. burserifolia</i> Mart. | 5.32 | 68 | 16,577 | 4,535 | 88,253  |

---
